# Supplementary material for: Exploring the effects of Dasatinib, Quercetin, and Fisetin on DNA methylation clocks: a longitudinal study on senolytic interventions
Source: publisher site journal article supplement (doi:10.18632/aging.205581), 2024-02-22
Supplement: Supplementary file [file aging-v16i4-205581-supplementary-material-SD1.pdf]

## SUPPLEMENTARY FIGURE

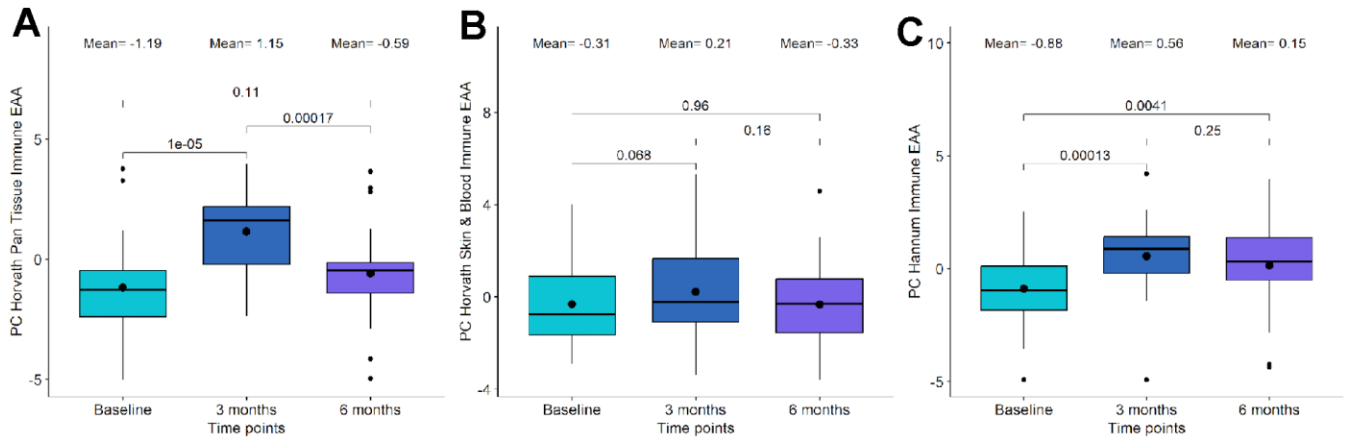

**Supplementary Figure 1. Boxplot showing the evolution of epigenetic age acceleration (EAA) first-generation clocks after adjusting by immune cells in the Dasatinib and Quercetin (DQ) study. (A) PC Horvath pan tissue Immune EAA. (B) PC Horvath Skin and Blood Immune EAA. (C) PC Hannum Immune EAA. In the X-axis, the time points of measurements, in the Y axis, the EAA measure adjusted by immune cells. On the top, the mean values at each time point and the p-values of the paired t-tests. The box represents the interquartile range (IQR) with the median represented as a horizontal line and the mean as the dot. The vertical lines show the minimum and maximum values. When outliers are identified, those values are represented as dots.**
