# Supplementary material for: Exploring the effects of Dasatinib, Quercetin, and Fisetin on DNA methylation clocks: a longitudinal study on senolytic interventions
Source: publisher site journal article supplement (doi:10.18632/aging.205581), 2024-02-22
Supplement: Supplementary file [file aging-v16i4-205581-supplementary-material-SD2.pdf]

**SUPPLEMENTARY TABLES**

**Supplementary Table 1. Differentially methylated loci for Dasatinib and Quercetin (DQ) treatment and Dasatinib, Quercetin, and Fisetin (DQF) treatment.**

| <b>Dasatinib and Quercetin</b>           |              |                 |                       |                      |                    |
|------------------------------------------|--------------|-----------------|-----------------------|----------------------|--------------------|
| <b>0-3 months</b>                        |              |                 |                       |                      |                    |
| <b>CpG site</b>                          | <b>logFC</b> | <b>diffMeth</b> | <b>P-Value</b>        | <b>FDR</b>           | <b>geneID</b>      |
| cg05915794                               | 0.2878       | Hyper           | 1.5·10 <sup>-12</sup> | 1.3·10 <sup>-6</sup> | HRNBP3             |
| cg18889307                               | -0.08974     | Hypo            | 6.9·10 <sup>-9</sup>  | 0.002                | TGIF1              |
| cg02889828                               | -0.1833      | Hypo            | 8.6·10 <sup>-9</sup>  | 0.002                |                    |
| cg27262015                               | -0.1243      | Hypo            | 2.0·10 <sup>-8</sup>  | 0.004                | SORBS2             |
| cg04704414                               | 0.1107       | Hyper           | 1.3·10 <sup>-7</sup>  | 0.022                | NUBP2              |
| cg06902281                               | 0.1175       | Hyper           | 1.9·10 <sup>-7</sup>  | 0.027                | ZNF169             |
| cg04955246                               | -0.155       | Hypo            | 2.5·10 <sup>-7</sup>  | 0.031                | PRKCA              |
| cg02840515                               | -0.1262      | Hypo            | 4.3·10 <sup>-7</sup>  | 0.039                | KIAA2012           |
| cg04132292                               | -0.2873      | Hypo            | 4.4·10 <sup>-7</sup>  | 0.039                |                    |
| cg25024143                               | -0.1463      | Hypo            | 4.6·10 <sup>-7</sup>  | 0.039                | SP2                |
| cg20273352                               | -0.1645      | Hypo            | 5.6·10 <sup>-7</sup>  | 0.044                | IGHMBP2            |
| <b>0-6 months</b>                        |              |                 |                       |                      |                    |
| <b>CpG site</b>                          | <b>logFC</b> | <b>diffMeth</b> | <b>P-Value</b>        | <b>FDR</b>           | <b>geneID</b>      |
| cg10585661                               | -0.1102      | Hypo            | 8.0·10 <sup>-8</sup>  | 0.035                | FAM131A            |
| cg05779406                               | 0.271        | Hyper           | 8.1·10 <sup>-8</sup>  | 0.035                | ZFAND2A            |
| <b>Dasatinib, Quercetin, and Fisetin</b> |              |                 |                       |                      |                    |
| <b>0-6 months</b>                        |              |                 |                       |                      |                    |
| <b>CpG site</b>                          | <b>logFC</b> | <b>diffMeth</b> | <b>P-Value</b>        | <b>FDR</b>           | <b>geneID</b>      |
| cg00379708                               | -0.1492      | Hypo            | 1.4·10 <sup>-9</sup>  | 6.7·10 <sup>-4</sup> | RBM20              |
| cg13172627                               | 0.5832       | Hyper           | 1.9·10 <sup>-9</sup>  | 6.7·10 <sup>-4</sup> | VENTXP1            |
| cg26676360                               | 0.1803       | Hyper           | 2.3·10 <sup>-9</sup>  | 6.7·10 <sup>-4</sup> | LRP1               |
| cg02632099                               | 0.3497       | Hyper           | 3.5·10 <sup>-9</sup>  | 7.5·10 <sup>-4</sup> |                    |
| cg18054725                               | -0.1509      | Hypo            | 9.2·10 <sup>-9</sup>  | 0.002                | ICAM3              |
| cg01613010                               | 0.2131       | Hyper           | 2.5·10 <sup>-8</sup>  | 0.002                |                    |
| cg16640929                               | -0.6613      | Hypo            | 2.6·10 <sup>-8</sup>  | 0.002                | ZBTB12             |
| cg00877151                               | 0.4233       | Hyper           | 2.8·10 <sup>-8</sup>  | 0.002                | IPO11-LRRC70;IPO11 |
| cg06310713                               | 0.3591       | Hyper           | 3.1·10 <sup>-8</sup>  | 0.002                | PALLD              |
| cg08187458                               | 0.1809       | Hyper           | 3.3·10 <sup>-8</sup>  | 0.002                |                    |
| cg00288652                               | -0.1792      | Hypo            | 3.5·10 <sup>-8</sup>  | 0.002                |                    |
| cg04706867                               | -0.1987      | Hypo            | 3.6·10 <sup>-8</sup>  | 0.002                | CNTNAP2            |
| cg09093137                               | -0.5388      | Hypo            | 3.7·10 <sup>-8</sup>  | 0.002                | SRPK2              |
| cg03012879                               | -0.4304      | Hypo            | 3.7·10 <sup>-8</sup>  | 0.002                | HMGR               |
| cg12993163                               | -0.1746      | Hypo            | 4.2·10 <sup>-8</sup>  | 0.002                | SHOX2              |

All the significant probes (FDR<0.05) for DQ analyses are included. However, only the top 15 probes are included in the DQF analysis.
